# Supplementary material for: Body Mass Index and Risks of Incident Ischemic Stroke Subtypes: The Japan Public Health Center-Based Prospective (JPHC) Study
Source: PubMed Central journal article supplement (PMC6680058; doi:10.2188/jea.je20170298), 2019-09-05
Supplement: je-29-325-s001.pdf [file je-29-325-s001.pdf]

**eTable 1.** Sub-distribution hazard ratios and 95% confidence intervals of incident ischemic stroke subtypes according to categories of baseline body mass index

|                     |                                         | Body mass index, kg/m <sup>2</sup> |                  |                  |         |                  |                  | Trend P <sup>c</sup> |        |
|---------------------|-----------------------------------------|------------------------------------|------------------|------------------|---------|------------------|------------------|----------------------|--------|
|                     |                                         | <19                                | 19- <21          | 21- <23          | 23- <25 | 25- <27          | 27- <30          |                      | ≥30    |
| Men, person-years   |                                         | 27,803                             | 106,145          | 192,782          | 209,841 | 1295,98          | 67,225           | 16,387               |        |
| LS                  | Number of incidents                     | 20                                 | 131              | 193              | 213     | 144              | 82               | 26                   |        |
|                     | Incidence rate <sup>a</sup>             | 0.72                               | 1.23             | 1.00             | 1.02    | 1.11             | 1.22             | 1.59                 |        |
|                     | Multivariable SHR (95% CI) <sup>b</sup> | 0.56 (0.35–0.89)                   | 1.10 (0.88–1.37) | 0.93 (0.77–1.13) | 1       | 1.11 (0.90–1.37) | 1.20 (0.93–1.55) | 1.50 (1.00–2.27)     | 0.005  |
| LAOS                | Number of incidents                     | 11                                 | 51               | 103              | 109     | 55               | 55               | 11                   |        |
|                     | Incidence rate <sup>a</sup>             | 0.40                               | 0.48             | 0.53             | 0.52    | 0.42             | 0.82             | 0.67                 |        |
|                     | Multivariable SHR (95% CI) <sup>b</sup> | 0.60 (0.32–1.12)                   | 0.82 (0.59–1.15) | 0.97 (0.74–1.27) | 1       | 0.84 (0.61–1.16) | 1.61 (1.17–2.23) | 1.25 (0.67–2.36)     | 0.004  |
| CES                 | Number of incidents                     | 21                                 | 62               | 157              | 142     | 97               | 71               | 18                   |        |
|                     | Incidence rate <sup>a</sup>             | 0.76                               | 0.58             | 0.81             | 0.68    | 0.75             | 1.06             | 1.10                 |        |
|                     | Multivariable SHR (95% CI) <sup>b</sup> | 0.82 (0.52–1.31)                   | 0.75 (0.55–1.01) | 1.10 (0.88–1.38) | 1       | 1.14 (0.88–1.48) | 1.64 (1.23–2.19) | 1.68 (1.03–2.76)     | <0.001 |
| Women, person-years |                                         | 44,615                             | 133,843          | 230,605          | 219,265 | 137,760          | 88,580           | 28,979               |        |
| LS                  | Number of incidents                     | 21                                 | 56               | 92               | 128     | 76               | 71               | 37                   |        |
|                     | Incidence rate <sup>a</sup>             | 0.47                               | 0.42             | 0.40             | 0.58    | 0.55             | 0.80             | 1.28                 |        |
|                     | Multivariable SHR (95% CI) <sup>b</sup> | 0.78 (0.49–1.24)                   | 0.79 (0.58–1.09) | 0.72 (0.55–0.93) | 1       | 0.86 (0.65–1.15) | 1.17 (0.87–1.57) | 1.82 (1.25–2.66)     | <0.001 |
| LAOS                | Number of incidents                     | 8                                  | 23               | 50               | 46      | 43               | 33               | 15                   |        |

|     |                                            |                  |                  |                  |      |                  |                  |                  |      |
|-----|--------------------------------------------|------------------|------------------|------------------|------|------------------|------------------|------------------|------|
|     | Incidence rate <sup>a</sup>                | 0.18             | 0.17             | 0.22             | 0.21 | 0.31             | 0.37             | 0.52             |      |
|     | Multivariable SHR<br>(95% CI) <sup>b</sup> | 0.81 (0.38–1.74) | 0.92 (0.56–1.52) | 1.11 (0.74–1.65) | 1    | 1.33 (0.87–2.02) | 1.42 (0.90–2.23) | 1.87 (1.04–3.38) | 0.01 |
| CES | Number of incidents                        | 15               | 43               | 66               | 53   | 50               | 47               | 24               |      |
|     | Incidence rate <sup>a</sup>                | 0.34             | 0.32             | 0.29             | 0.24 | 0.36             | 0.53             | 0.83             |      |
|     | Multivariable SHR<br>(95% CI) <sup>b</sup> | 1.43 (0.81–2.53) | 1.56 (1.04–2.33) | 1.27 (0.88–1.82) | 1    | 1.32 (0.90–1.95) | 1.77 (1.19–2.62) | 2.55 (1.56–4.19) | 0.06 |

CES, cardioembolic stroke; CI, confidence interval; LAOS, large-artery occlusive stroke LS, lacunar stroke; SHR, sub-distribution hazard ratio.

<sup>a</sup> Crude incidence rates were expressed as rate per 1,000 person-years.

<sup>b</sup> Adjusted for baseline age, smoking, alcohol consumption, leisure-time physical activity, and histories of hypertension, dyslipidemia and diabetes mellitus.

<sup>c</sup> Median values of baseline body mass index in each categories were used for test of a linear trend across categories.

**eTable 2.** Hazard ratios and 95% confidence intervals of incident ischemic stroke subtypes according to categories of updated body mass index

|                     |                                        | Body mass index, kg/m <sup>2</sup> |                  |                  |         |                  |                  | Trend P <sup>c</sup> |        |
|---------------------|----------------------------------------|------------------------------------|------------------|------------------|---------|------------------|------------------|----------------------|--------|
|                     |                                        | <19                                | 19- <21          | 21- <23          | 23- <25 | 25- <27          | 27- <30          |                      | ≥30    |
| Men, person-years   |                                        | 23,967                             | 78,662           | 138,760          | 155,903 | 97,338           | 53,351           | 12,890               |        |
| LS                  | Number of incidents                    | 20                                 | 89               | 130              | 149     | 88               | 60               | 15                   |        |
|                     | Incidence rate <sup>a</sup>            | 0.83                               | 1.13             | 0.94             | 0.96    | 0.90             | 1.12             | 1.16                 |        |
|                     | Multivariable HR (95% CI) <sup>b</sup> | 0.67 (0.42–1.07)                   | 1.04 (0.79–1.35) | 0.92 (0.73–1.16) | 1       | 1.01 (0.78–1.32) | 1.22 (0.90–1.65) | 1.29 (0.76–2.21)     | 0.17   |
| LAOS                | Number of incidents                    | 9                                  | 34               | 61               | 79      | 46               | 20               | 7                    |        |
|                     | Incidence rate <sup>a</sup>            | 0.38                               | 0.43             | 0.44             | 0.51    | 0.47             | 0.37             | 0.54                 |        |
|                     | Multivariable HR (95% CI) <sup>b</sup> | 0.58 (0.29–1.16)                   | 0.77 (0.51–1.15) | 0.82 (0.59–1.15) | 1       | 0.97 (0.67–1.39) | 0.72 (0.44–1.18) | 1.09 (0.50–2.36)     | 0.07   |
| CES                 | Number of incidents                    | 20                                 | 46               | 83               | 113     | 54               | 42               | 10                   |        |
|                     | Incidence rate <sup>a</sup>            | 0.83                               | 0.58             | 0.60             | 0.72    | 0.55             | 0.79             | 0.78                 |        |
|                     | Multivariable HR (95% CI) <sup>b</sup> | 0.87 (0.54–1.40)                   | 0.72 (0.51–1.01) | 0.77 (0.58–1.03) | 1       | 0.82 (0.59–1.13) | 1.14 (0.80–1.63) | 1.19 (0.62–2.28)     | 0.13   |
| Women, person-years |                                        | 35,564                             | 94,942           | 164,119          | 157,561 | 103,767          | 67,176           | 23,152               |        |
| LS                  | Number of incidents                    | 11                                 | 37               | 59               | 65      | 64               | 57               | 29                   |        |
|                     | Incidence rate <sup>a</sup>            | 0.31                               | 0.39             | 0.36             | 0.41    | 0.62             | 0.85             | 1.25                 |        |
|                     | Multivariable HR (95% CI) <sup>b</sup> | 0.68 (0.36–1.29)                   | 0.99 (0.66–1.48) | 0.91 (0.64–1.30) | 1       | 1.35 (0.95–1.91) | 1.73 (1.21–2.47) | 2.32 (1.49–3.61)     | <0.001 |
| LAOS                | Number of incidents                    | 6                                  | 11               | 22               | 28      | 23               | 15               | 14                   |        |

|           |                                           |                  |                  |                  |      |                  |                  |                  |      |
|-----------|-------------------------------------------|------------------|------------------|------------------|------|------------------|------------------|------------------|------|
| incidents |                                           |                  |                  |                  |      |                  |                  |                  |      |
|           | Incidence rate <sup>a</sup>               | 0.17             | 0.12             | 0.13             | 0.18 | 0.22             | 0.22             | 0.60             |      |
|           | Multivariable HR<br>(95% CI) <sup>b</sup> | 0.89 (0.36–2.16) | 0.70 (0.35–1.42) | 0.81 (0.46–1.41) | 1    | 1.11 (0.64–1.92) | 1.02 (0.54–1.91) | 2.51 (1.31–4.81) | 0.03 |
| CES       | Number of<br>incidents                    | 19               | 21               | 37               | 37   | 18               | 26               | 11               |      |
|           | Incidence rate <sup>a</sup>               | 0.53             | 0.22             | 0.23             | 0.23 | 0.17             | 0.39             | 0.48             |      |
|           | Multivariable HR<br>(95% CI) <sup>b</sup> | 2.10 (1.20–3.68) | 1.01 (0.59–1.73) | 1.02 (0.65–1.62) | 1    | 0.64 (0.37–1.13) | 1.32 (0.80–2.19) | 1.44 (0.73–2.83) | 0.86 |

CES, cardioembolic stroke; CI, confidence interval; HR, hazard ratio; LAOS, large-artery occlusive stroke; LS, indicates lacunar stroke.

<sup>a</sup> Time-dependent crude incidence rates were expressed as rate per 1,000 person-years within each 5-year follow-up interval.

<sup>b</sup> Adjusted for baseline age, updated smoking, alcohol consumption, leisure-time physical activity, and histories of hypertension, dyslipidemia and diabetes mellitus.

<sup>c</sup> Median values of updated body mass index in each categories were used for test of a linear trend across categories.
